# Supplementary material
Source: publisher site journal article supplement (https://www.dovepress.com/article/480674)
Supplement: Supplementary file 1 [file get_supplementary_file.php]

**Supplementary Table 1.** Proposed improvement actions at the first meeting and the average score of the multidisciplinary group (1=minimum relevance; 10=maximum relevance).

| N | Action | Score |
| --- | --- | --- |
| 1 | Establish FLS in hospitals. | 9.4 |
| 2 | Introduce secondary fracture prevention in chronic care programmes | 9.4 |
| 3 | Introduce continuity of care indicators in management agreements | 9.3 |
| 4 | Intensify communication between primary care and other specialities | 9.2 |
| 5 | Provide specific training for primary care | 9.1 |
| 6 | Provide specific training for managers and encourage their involvement | 9.1 |
| 7 | Involve nursing staff in the follow-up of the patient | 9 |
| 8 | Draw up a register of all fragility fractures | 9 |
| 9 | Systematised adherence monitoring | 8.9 |
| 10 | Identify at-risk patients through emergency records | 8.9 |
| 11 | Conduct public awareness campaigns on osteoporosis and fractures | 8.7 |
| 12 | Develop/update CPGs at the national level | 8.7 |
| 13 | Define a multidisciplinary follow-up plan | 8.6 |
| 14 | Promote telemedicine | 8.5 |
| 15 | Conduct information campaigns for dentists | 8.4 |
| 16 | Involve community pharmacy in awareness and communication campaigns | 8.4 |
| 17 | Define a comprehensive and individualised treatment plan | 8.3 |
| 18 | Conduct clinical case training sessions | 8.1 |
| 19 | Boosting the educational work of pharmacists' offices | 8.1 |
| 20 | Provide information material on patient guidelines to be followed | 7.7 |

**CPG: clinical practice guideline; FLS: fracture liaison service.**

**Supplementary Table 2.** Objectives and stakeholders of the improvement actions and sub-actions.

| **Sub-action 1.1: Encourage the creation of FLS** | |
| --- | --- |
| Objective | To reduce the risk of fragility fracture in women at high risk of fragility fracture (secondary prevention) by improving patient follow-up and treatment. |
| Stakeholders | - fragility fracture and postmenopausal OP patients - SNHS - health professionals specialising in: - bone metabolism (rheumatology, internal medicine, endocrinology and, depending on the centre, geriatrics)   - orthopaedic surgery and traumatology   - radiology   - rehabilitation   - primary care   - orthogeriatric   - nursing (case management)   - emergency care   - hospital pharmacy |
| **Sub-Action 1.2: Create a "fracture code".** | |
| Objective | To improve the identification and registration process of patients with OP and fragility fractures and, therefore, their treatment and follow-up. |
| Stakeholders | - fragility fracture patients - SNHS - health professionals |
| **Sub-Action 1.3: Provide written information on the disease, guidelines and secondary prevention to patients and families** | |
| Objective | To increase patients' and families' awareness of the importance of secondary prevention |
| Stakeholders | - fragility fracture and postmenopausal OP patients - non-professional carers of patients - SHNS - health professionals - patient advocacy groups - pharmacy offices - nursing homes |
| **Sub-Action 2.1: Harmonise the main recommendations of existing CPGs at the national level** | |
| Objective | To homogenise and improve the treatment and follow-up of patients. |
| Stakeholders | - fragility fracture and postmenopausal OP patients - SHNS - health professionals - scientific societies |
| **Sub-Action 2.2: Provide training on fragility fracture prevention in OP for primary care physicians** | |
| Objective | To contribute to the identification of postmenopausal patients with OP at risk of suffering a second fracture and thus improve their treatment and follow-up, and to increase knowledge of the most appropriate therapeutic alternatives for each patient profile. |
| Stakeholders | - fragility fracture and postmenopausal OP patients - SHNS - health professionals |
| **Sub-Action 2.3: Conduct clinical case presentation and discussion sessions between specialised and primary care** | |
| Objective | To raise awareness of the importance of secondary prevention and the measures employed to this end, including establishing FLS or fracture registries. |
| Stakeholders | - fragility fracture and postmenopausal OP patients - SHNS - health professionals |
| **Sub-Action 2.4: Conduct clinical case presentations and discussion sessions for emergency and radiology staff.** | |
| Objective | To improve the identification of postmenopausal patients with OP and fragility fracture by ED and radiology. |
| Stakeholders | - fragility fracture and postmenopausal OP patients - SHNS - health professionals |
| **Sub-Action 2.5: Provide training on the importance of secondary prevention of fragility fracture for dentists and maxillofacial surgeons.** | |
| Objective | To raise awareness among dentists and maxillofacial surgeons on the importance of OP secondary prevention and the maintenance of pharmacological treatment. |
| Stakeholders | - patients with OP and fragility fracture - SNHS - Healthcare professionals including odontologists and maxillofacial surgeons |
| **Sub-Action 2.6: Provide training on the importance of secondary prevention of fragility fractures for community pharmacists.** | |
| Objective | To improve community pharmacists' knowledge of the importance of secondary prevention and patients' adherence to treatment and pharmacotherapeutic follow-up. |
| Stakeholders | - fragility fracture and postmenopausal OP patients - SHNS - health professionals - pharmacy offices |
| **Action 3: Promote health professionals' adherence to fracture registers** | |
| Objective | To improve the quality of care of postmenopausal women with OP and fracture, optimising their follow-up and treatment and the prevention of fractures. |
| Stakeholders | - fragility fracture and postmenopausal OP patients - SHNS - health professionals - scientific societies |
| **Action 4: Raise awareness of osteoporosis and fractures in the society** | |
| Objective | To raise public and patient awareness of the long-term consequences of OP and fragility fractures, highlighting the importance and role of secondary prevention and its consideration as a chronic disease. |
| Stakeholders | - general population - fragility fracture and postmenopausal OP patients - patient advocacy groups - SHNS - health professionals - health centres - pharmacies (community pharmacy) - nursing homes |
| ED: emergency department; FLS: fracture liaison service; OP: osteoporosis; SNHS: Spanish National Health System | |

**Supplementary Table 3**. Resources and necessary costs for implementing improvement actions.

ST3-1. Estimated investment of Sub-Action 1 (Action 1)

| Stakeholders | Steps | Resources |
| --- | --- | --- |
| SHNS | Recruitment of staff (case management nurses) | Staff required calculated from No. of patients eligible for inclusion in FLS  Case management nurse time (h) per patient in 1 year (assuming 3 calls of 10 minutes duration per year) |
| Development of quality-of-care standards among experts | Two meetings (opening and closing) of 2 hours each and time for elaboration, review and training (6 hours per expert) = 10 hours per expert. |
| 2 specialists in bone metabolism, 1 in traumatology and surgery, 1 in radiology, 1 in rehabilitation, 1 in hospital pharmacy, 1 in nursing, 1 in emergency care, 1 in primary care  1 expert patient  1 representative of each Spanish region | 9 specialists |
| 1 patient |
| 17 representants |
| Management of scientific endorsements | 3 scientific endorsements |
| Design and layout of the document | Market cost for guide design |
| Dissemination of the document to all PC centres and hospitals that treat patients with fragility fractures in the SHNS (hospitals with trauma services will be considered). | Sending through institutional channels of a note advising of the document's publication. |
| The communication channels already in place would be used, so there would be no extra cost to the SHNS. |
| Web publication of recommendations | It is assumed that it would be included in the contracted web services. |
| Presentation day of the process (online) | Market price |
| Healthcare professionals | Creation of multidisciplinary teams for the management of FLS | Staffing requirements calculated from the number of patient candidates for FLS. Specialist time commitment |
| Training assistance | Training time within the working day |
| Case management nursing | Follow-up calls to the patient (every 3 months; 4 calls per patient per year) | Cost calculated from annual salary (within working hours) and the number of nurses required. |
| Total investment cost | | €806,698 |

ST3-2. Estimated investment of Sub-Action 2 (Action 1)

| Stakeholders | Steps | Resources |
| --- | --- | --- |
| SNHS | Meetings of a multidisciplinary working group to agree on the care process. | 3 meetings of 2 h each = 6 hours per expert |
| 2 specialists in bone metabolism, 1 in traumatology and surgery, 1 in radiology, 1 in nursing, 1 in emergencies, 1 in primary care.  1 expert patient | Teaching hours: 2 hours per expert |
| 7 specialists |
| 1 patient |
| Management of scientific endorsements | 3 scientific endorsements |
| Design and layout of the document | Market cost for guide design |
| Dissemination of the document to all PC centres and hospitals that treat patients with fragility fractures in the SHNS (hospitals with trauma services will be considered). | Sending through institutional channels a note advising of the publication of the document. |
| Communication channels already in place would be used, so there would be no extra cost to the SHNS. |
| Day of presentation of the process to the Autonomous Regions (online) | Market price |
| 1 in each region |
| Adaptation of the care process in each department/health area, including:  - the adaptation of the process  - staff training  Two specialists in bone metabolism, 1 in traumatology and surgery, 1 in radiology, 1 in nursing, 1 in emergencies, 1 in primary care. | In each hospital: dedication of a multidisciplinary team to the adaptation of the process and training of the staff involved (6 hours per expert; salary/hour). |
| Hospitals with implementation in year 1 (40% assumed, N = 158) |
| Healthcare professionals | Training assistance | Training time within the working day |
| Total investment cost | | €282,778 |

ST3-3. Estimated investment of Sub-Action 3 (Action 1)

| Stakeholders | Steps | Resources |
| --- | --- | --- |
| SHNS | Meetings of the multidisciplinary working group to reach a consensus on the content of the document (7 experts). | 2 meetings (opening and closing) of 2h each, and time for elaboration and revision (2 hours per expert) = 6 hours per expert |
| Specialists: 2 in bone metabolism, 1 in traumatology and surgery, 1 in rehabilitation, 1 in nursing, and 1 in primary care. | 6 specialists |
| 1 expert patient | 1 patient |
| Preparation of the content of the information document by the working group (review of the leading clinical practice guidelines and preparation of a series of recommendations regarding secondary prevention and guidelines to be followed by the patient after discharge, including, for example, dietary recommendations, information on treatments and side effects, advice on how to avoid falls, simple exercise plan to be carried out at home) | |
| Focus group with patients | The market cost for meeting with 4-5 patients and payment to the patient association will be considered. |
| Management of scientific endorsements | 2 endorsements |
| Design and layout of the leaflet | Market cost |
| Printing of the leaflet | Market costs of printing a leaflet x no. of printings according to destination (100 brochures per hospital, 158 hospitals) |
| Distribution of the leaflet to hospitals caring for patients with fragility fractures (hospitals with trauma services are considered), patient associations, pharmacy offices, day centres | The market cost of postal delivery of the leaflet |
| No. of copies to be sent to each hospital, association, pharmacy and day centre |
| Total investment cost | | €34,136 |

ST3-4. Estimated investment of Sub-Action 1 (Action 2)

| Stakeholders | Steps | Resources |
| --- | --- | --- |
| SHNS | Meetings of the multidisciplinary working group to draft and revise the document | 3 meetings of 2h each + time for elaboration, review and training (12 hours per expert) = 18 hours per expert |
| Specialists: 2 in bone metabolism, 1 in traumatology and surgery, 1 in radiology, 1 in rehabilitation, 1 in hospital pharmacy, 1 in emergency medicine, 1 in nursing, 1 in primary care, 1 in health care.  1 patient representative | 9 specialists |
| 1 patient |
| Management of scientific endorsements | 3 scientific endorsements |
| Design and layout of the document | Market cost for guide design |
| Dissemination of the document to all PC centres and hospitals that treat patients with fragility fractures in the NHS (hospitals with trauma services will be considered). | Sending through institutional channels a note advising of the publication of the document of harmonisation of recommendations on the ministry's website. |
| Communication channels already in place would be used, so there would be no extra cost to the SNHS. |
| Presentation day (online) | Market price |
| Publication on the web of the recommendations of the scientific societies. | It is assumed that it would be included in the web services already contracted. |
| Healthcare professionals | Attendance at training | Time within their working day |
| Total investment cost |  | €37,510 |

ST3-5. Estimated investment for Sub-Action 2.2 (Action 2)

| Stakeholders | Steps | Resources |
| --- | --- | --- |
| SNHS | Conduction of an annual CFC-accredited online training course on osteoporosis and secondary prevention of fragility fracture.  Course duration is assumed to be 6 hours. | Human resources for teaching: |
| 10 specialist teachers in bone metabolism and others (e.g., 2 specialists in PC, 2 in rheumatology, 1 in traumatology, 1 in orthogeriatric, 1 in nursing, 1 in endocrinology, 1 in rehabilitation, 1 in pharmacy). |
| 6 h for the preparation of the material by each teacher |
| Preparation of materials |
| 3 teachers to teach the course |
| 6 hours of course duration |
| No. of hospitals with trauma service (N = 316) |
| Accreditation of the course in all Spanish regions |
| Management of scientific endorsements | 2 scientific society endorsements |
| Primary care doctors | Training assistance | Training time within the working day |
| Total investment cost | | €524,581 |

ST3-6. Estimated investment for Sub-Action 2.3 (Action 2)

| Stakeholders | Steps | Resources |
| --- | --- | --- |
| Healthcare professionals | Preparation of two meetings per year: | Estimated time for each session (outside working hours) 6h (3h preparation + 3h meeting) |
| Average hourly wage of 2 bone metabolism specialists and 1 PA |
| 1 annual online session by specialists for all health centres in the area. | Assumes 1 session per hospital (delivered at the same time to all health centres in the area) (N=316) |
| 1 additional annual face-to-face session per health centre, including a primary care trainer | Estimated time for each session (outside working hours) 6h (3h preparation + 3h meeting). |
| These will be sessions in which clinical cases will be discussed to debate the best approach and follow-up of postmenopausal patients with OP after fragility fracture. | Average hourly wage of 2 bone metabolism specialists, 1PC |
| 1 session per health centre (N = 2,063) |
| Attendance at meetings | 3 hours per meeting within working hours. |
| Total investment cost | | €976,099 |

ST3-7. Estimated investment for Sub-Action 2.4 (Action 2)

| Stakeholders | Steps | Resources |
| --- | --- | --- |
| Healthcare professionals | Preparation of an annual session between specialised care (coordinated fracture unit, if it exists) and emergency and radiology staff.  These will be sessions in which clinical cases will be discussed. | Estimated time for each 6-hour session (outside working hours): 3h preparation + 3h meeting time |
| No. of hospitals caring for patients with fragility fracture (assumes hospitals with trauma service, N = 316) |
| Average hourly wage of 2 specialists in bone metabolism, 1 in emergency medicine, 1 in radiology |
| Attendance at meetings | 3 hours per meeting within working hours. |
| Total investment cost | | €175,642 |

ST3-8. Estimated investment of Sub-Action 2.5 (Action 2)

| Stakeholders | Steps | Resources |
| --- | --- | --- |
| SHNS | Conduction of an annual online training day (6 hours) | Human resources for teaching: |
| Assumes 3 speakers (1 PA specialist, 1 nurse, 1 specialist involved in the management of OP part of a FLS). |
| 6 hours of material development and 6 hours per edition. |
| 50 editions are assumed |
| Management of scientific endorsements | 2 scientific endorsements |
| Dentists and maxillofacial surgeons | Training assistance | Training time within the working day |
| Total investment cost | | €88,620 |

ST3-9. Estimated investment for Sub-Action 2.6 (Action 2)

| Stakeholders | Steps | Resources |
| --- | --- | --- |
| SHNS | Conduction of a CFC-accredited online training course for community pharmacists (20 hours). | Human resources for teaching: |
| Adaptation of materials developed for sub-action 2.5 |
| 4 hours of each professional |
| 10 specialist teachers in bone metabolism and others (e.g. 2 specialists in PC, 2 in rheumatology, 1 in traumatology, 1 in orthogeriatrics, 1 in nursing, 1 in endocrinology, 1 in rehabilitation, 1 in pharmacy). |
|
| 50 editions are assumed |
| Accreditation of the course in all regions |
| Management of scientific endorsements | 2 endorsements |
| Pharmacists | Training assistance | Training time outside working hours |
| Total investment cost | | €187,261 |

ST3-10. Estimated investment of action 3

| Stakeholders | Steps | Resources |
| --- | --- | --- |
| SHNS | Open information day for healthcare professionals. It will consist of 2 sessions (1 per registration) in which the results obtained will be discussed and awareness will be raised about the advantages of its use. | 2 sessions |
| Online training course on the operation and use of the register for centres interested in the register. | Market price |
| No. of new centres joining the national registers (assuming the % that results in 50% of hospitals joining [n=316] without subtracting those already existing) |
| No. of centres affiliated to the RFC (N=72) |
| No. of centres affiliated to REFRA (N=13) |
| Support in analysing the information and elaborating the biannual report of the 2 registers. | No. of records (N=2) |
| Market price |
| Healthcare professionals | Time spent on data collection for registers and monitoring of data quality (annual) | Half an hour per patient and an average of 50 patients per year in each centre (No. hours/year=75). |
| No. of new centres joining the national registers (assuming the % that results in 50% of hospitals joining [n=316] without subtracting those already existing) |
| Hourly wage per professional specialist |
| Training assistance | Within working hours |
| Total investment cost | | €379,410 |

ST3-11. Estimated investment of action 4

| Stakeholders | Steps | Resources |
| --- | --- | --- |
| SHNS | Working meetings to agree on the contents of the advertising campaign and the information poster. | 2 meetings with a duration per meeting of 4 h (8 h for each expert) |
| 7 experts: 2 specialists in bone metabolism, 1 in traumatology and surgery, 1 in rehabilitation, 1 in nursing and 1 in primary care. | 7 specialists |
| 1 expert patient | 1 patient |
| Elaboration of information campaign on TV, radio, bus (different formats). | The market cost of developing the formats for video, radio and bus advertisements based on the content defined by the experts. |
| Dissemination of the public information campaign in the media | Cost of broadcasting the campaign on TV channels |
| Cost of the radio broadcast of the campaign |
| Cost of the campaign in means of transport (taxi, bus) |
| Poster design | The market cost of poster design |
| Poster printing | Market costs of printing one poster |
| One copy for each PC centre, hospital (one for the emergency department, one for general consultations, one for the traumatology department), 1 copy for pharmacies (No. of pharmacies), 1 copy for day-care centres (No. of pharmacies), 1 copy for day-care centres (No. of day-care centres), 1 copy for the emergency department (No. of pharmacies). |
| Sending of posters | Poster delivery cost x number of centres (28,155) |
| Total investment cost | | €882,928 |

FLS: fracture liaison service; OP: osteoporosis; PC: primary care; REFRA: Spanish fractures register; RFC: Hip fractures register; SNHS: Spanish National Health System; TV: television.

**Supplementary Table 4**. Estimation of willingness to pay (WTP) in each domain of health-related quality of life considered.

| Domain | % affected | | Base-case  Average WTP a | Best-case  Average WTPb | Worst-case  Average WTPc |
| --- | --- | --- | --- | --- | --- |
| Work situation | | 47 % | €379.46 | €670.00 | €351.03 |
| Ability to carry out daily activities | | 48 % | €625.00 | €887.50 | €701.61 |
| Same degree of mobility | | 47 % | €598.21 | €904.17 | €547.99 |
| Same degree of pain | | 72 % | €587.21 | €1,054.17 | €424.42 |
| Leisure activities | | 35 % | €446.43 | €766.67 | €194.14 |
| Family relations | | 11 % | €432.69 | €687.50 | €199.50 |
| Intimate life | | 20 % | €468.75 | €629.17 | €385.42 |
| Emotional state | | 42 % | €605.00 | €829.17 | €652.86 |
| Total cost of WTP | | -- | 1,728.13 € | €2,733.19 | €1,501.49 |

aCost weighted to the proportion of patients showing impairment in each domain. To avoid cost overestimation, a 50% correction was applied to the WTP value of each domain assigned by patients to discount the possible influence of the improvement of other domains on that specific domain. bAll patients considered, without applying any correction. cWTP of patients showing impairment in each domain minus WTP of patients not showing impairment on that domain.

**Supplementary Table 5**. SROI results: overall and broken down per action for all scenarios considered.

| Scenario | Global SROI  (Return per €1 invested) | SROI by actions  (Return per €1 invested) |
| --- | --- | --- |
| **Base-case:** social perspective and 1-year horizon | **22.15** | Action 1: 28.69  Action 2: 23.14  Action 3: 24.29  Action 4: 10.70 |
| **Alternative scenario 1**: SHNS perspective and 1-year horizon | **8.33** | Action 1: 9.99  Action 2: 9.39  Action 3: 8.45  Action 4: 3.79 |
| **Alternative scenario 2**: social perspective and 3-year horizon | **32.23** | Action 1: 40.35  Action 2: 34.84  Action 3: 34.12  Action 4: 15.18 |
| **Alternative scenario 3**: SHNS perspective and 3-year horizon | **6.61** | Action 1: 7.86  Action 2: 7.43  Action 3: 6.59  Action 4: 3.16 |

SHNS: Spanish Health National System; SROI: social return on investment.
